# Supplementary material
Source: PubMed Central journal article supplement (PMC6330109)
Supplement: NIHMS872027-supplement-supplement_1.pdf [file NIHMS872027-supplement-supplement_1.pdf]

## Supplemental Material

**Supplemental Table 1.** Unadjusted and adjusted hazard ratios for sustained VT and ICD shock recurrence after CSD.

| <b>Sustained VT/ICD Shock Recurrence</b> |                               |                  |                             |                |
|------------------------------------------|-------------------------------|------------------|-----------------------------|----------------|
| <b>Effect</b>                            | <b>Unadjusted HR (95% CI)</b> | <b>P value</b>   | <b>Adjusted HR (95% CI)</b> | <b>P value</b> |
| Age (y)                                  | 1.02 (1.00, 1.04)             | 0.09             | 0.99 (0.96, 1.02)           | 0.42           |
| Female                                   | 0.69 (0.34, 1.37)             | 0.29             | 0.95 (0.40, 2.29)           | 0.92           |
| NYHA (Ref = I)                           |                               | <b>0.004</b>     |                             | <b>0.01</b>    |
| II                                       | 3.73 (0.88, 15.85)            | <b>0.075</b>     | 3.96 (0.87, 18.10)          | <b>0.078</b>   |
| III                                      | 3.01 (0.70, 12.98)            | 0.14             | 7.40 (1.58, 34.68)          | <b>0.01</b>    |
| IV                                       | 13.51 (2.65, 68.94)           | <b>0.002</b>     | 15.04 (2.72, 83.20)         | <b>0.002</b>   |
| Polymorphic VT                           | 0.62 (0.33, 1.18)             | 0.15             | 1.11 (0.50, 2.47)           | 0.80           |
| >1 VT Morphology                         | 1.70 (0.92, 3.12)             | <b>0.088</b>     | 0.80 (0.36, 1.74)           | 0.57           |
| Longest VT CL (20ms)                     | 1.12 (1.06, 1.18)             | <b>&lt;0.001</b> | 1.13 (1.04, 1.22)           | <b>0.003</b>   |
| # Previous VT Ablations                  | 1.13 (0.97, 1.32)             | 0.13             | 0.86 (0.68, 1.11)           | 0.24           |
| CKD                                      | 1.99 (1.08, 3.67)             | <b>0.028</b>     | 1.07 (0.45, 2.53)           | 0.89           |
| >1 AAD                                   | 2.08 (1.18, 3.66)             | <b>0.011</b>     | 1.29 (0.62, 2.69)           | 0.50           |
| Left Only                                | 1.54 (0.80, 2.94)             | 0.19             | 1.03 (0.48, 2.23)           | 0.94           |

OHT = orthotopic heart transplantation, ICM = ischemic cardiomyopathy, NICM = non-ischemic cardiomyopathy, NYHA = New York Heart Association, AAD = anti-arrhythmic drug, CL = cycle length, DM = diabetes mellitus, CKD = chronic kidney disease, Ref = reference class used for comparison of other classes. Highlighted p values represent those where baseline comparisons yielded a value < 0.1.

**Supplemental Table 2.** Unadjusted and adjusted hazard ratios for combined endpoint of cardiac transplantation and death.

| <b>Death/OHT</b>        |                               |                |                             |                |
|-------------------------|-------------------------------|----------------|-----------------------------|----------------|
| <b>Effect</b>           | <b>Unadjusted HR (95% CI)</b> | <b>P value</b> | <b>Adjusted HR (95% CI)</b> | <b>P value</b> |
| Age (y)                 | 1.05 (1.02, 1.09)             | < <b>0.001</b> | 1.01 (0.97, 1.04)           | 0.78           |
| Female                  | 1.01 (0.46, 2.21)             | 0.98           | 1.39 (0.39, 4.99)           | 0.62           |
| EF (%)                  | 0.97 (0.95, 1.00)             | <b>0.06</b>    | 0.98 (0.94, 1.01)           | 0.20           |
| NYHA (Ref = Class I)    |                               | < <b>0.001</b> |                             | <b>0.009</b>   |
| II                      | 0.69 (0.22, 2.18)             | 0.53           | 0.64 (0.17, 2.35)           | 0.50           |
| III                     | 0.99 (0.32, 3.05)             | 0.99           | 0.58 (0.14, 2.44)           | 0.46           |
| IV                      | 11.16 (3.17, 39.30)           | < <b>0.001</b> | 5.44 (1.27, 23.29)          | <b>0.022</b>   |
| >1 VT Morphology        | 2.21 (1.07, 4.55)             | <b>0.03</b>    | 2.80 (0.89, 8.81)           | <b>0.08</b>    |
| Longest VT CL (20ms)    | 1.06 (0.99, 1.13)             | <b>0.08</b>    | 0.95 (0.87, 1.04)           | 0.24           |
| # Previous VT Ablations | 1.10 (0.91, 1.32)             | 0.34           | 0.82 (0.60, 1.11)           | 0.20           |
| DM                      | 3.01 (1.56, 5.80)             | <b>0.001</b>   | 2.43 (0.71, 8.38)           | 0.16           |
| CKD                     | 5.74 (2.79, 11.82)            | < <b>0.001</b> | 4.51 (1.45, 14.04)          | <b>0.009</b>   |
| >1 AAD                  | 2.47 (1.28, 4.78)             | <b>0.007</b>   | 2.32 (0.88, 6.13)           | 0.089          |
| Left Only               | 2.66 (1.37, 5.17)             | <b>0.004</b>   | 2.65 (1.00, 7.00)           | <b>0.050</b>   |

OHT = orthotopic heart transplantation, ICM = ischemic cardiomyopathy, NICM = non-ischemic cardiomyopathy, NYHA = New York Heart Association, AAD = anti-arrhythmic drug, CL = cycle length, DM = diabetes mellitus, CKD = chronic kidney disease, Ref = reference class used for comparison of other classes. Highlighted p values represent those where baseline comparisons yielded a value < 0.1.

**Supplemental Table 3.** Unadjusted and adjusted hazard ratios for combined endpoint of sustained VT/ICD shock recurrence, cardiac transplantation, and death.

| <b>VT Recurrence/Death/OHT</b> |                               |                  |                             |                  |
|--------------------------------|-------------------------------|------------------|-----------------------------|------------------|
| <b>Effect</b>                  | <b>Unadjusted HR (95% CI)</b> | <b>P value</b>   | <b>Adjusted HR (95% CI)</b> | <b>P value</b>   |
| Age (y)                        | 1.03 (1.01, 1.06)             | <b>0.003</b>     | 1.00 (0.97, 1.03)           | 0.93             |
| Female                         | 0.76 (0.42, 1.36)             | 0.35             | 0.87 (0.38, 1.95)           | 0.73             |
| NYHA (Ref = I)                 |                               | <b>&lt;0.001</b> |                             | <b>0.004</b>     |
| II                             | 1.82 (0.70, 4.74)             | 0.22             | 1.97 (0.70, 5.57)           | 0.20             |
| III                            | 1.62 (0.62, 4.24)             | 0.33             | 4.07 (1.36, 12.18)          | <b>0.012</b>     |
| IV                             | 8.77 (2.76, 27.90)            | <b>&lt;0.001</b> | 8.77 (2.49, 30.95)          | <b>&lt;0.001</b> |
| >1 VT Morphology               | 1.96 (1.14, 3.36)             | <b>0.015</b>     | 0.91 (0.43, 1.93)           | 0.80             |
| Polymorphic VT                 | 0.81 (0.47, 1.41)             | 0.46             | 1.66 (0.78, 3.54)           | 0.19             |
| Longest VT CL (20ms)           | 1.10 (1.05, 1.16)             | <b>&lt;0.001</b> | 1.11 (1.03, 1.20)           | <b>0.005</b>     |
| # Previous VT Ablations        | 1.11 (0.97, 1.27)             | 0.14             | 0.88 (0.72, 1.08)           | 0.22             |
| DM                             | 2.18 (1.26, 3.75)             | <b>0.005</b>     | 0.54 (0.23, 1.29)           | 0.17             |
| CKD                            | 2.67 (1.56, 4.56)             | <b>&lt;0.001</b> | 1.49 (0.70, 3.18)           | 0.30             |
| >1 AAD                         | 1.96 (1.20, 3.20)             | <b>0.007</b>     | 1.16 (0.59, 2.29)           | 0.67             |
| Left Only                      | 1.93 (1.13, 3.30)             | <b>0.016</b>     | 1.95 (1.01, 3.76)           | <b>0.047</b>     |

OHT = orthotopic heart transplantation, ICM = ischemic cardiomyopathy, NICM = non-ischemic cardiomyopathy, NYHA = New York Heart Association, AAD = anti-arrhythmic drug, CL = cycle length, DM = diabetes mellitus, CKD = chronic kidney disease, Ref = reference class used for comparison of other classes. Highlighted p values represent those where baseline comparisons yielded a value < 0.1.

**Supplemental Table 4.** Baseline characteristics of left only vs. bilateral CSD patients.

|                                                                           |           | <b>Left only</b><br>(N=23) | <b>Bilateral</b><br>(N=98) | <b>P-value</b> |
|---------------------------------------------------------------------------|-----------|----------------------------|----------------------------|----------------|
| <b>Age (Mean (SD))</b>                                                    |           | 59.1 (12.3)                | 54.3 (13.3)                | 0.110          |
| <b>Sex</b>                                                                |           |                            |                            | 0.204          |
|                                                                           | F         | 3 (13.0%)                  | 28 (28.6%)                 |                |
|                                                                           | M         | 20 (87.0%)                 | 70 (71.4%)                 |                |
| <b>ICM/NICM</b>                                                           |           |                            |                            | 0.060          |
|                                                                           | NICM      | 12 (52.2%)                 | 74 (75.5%)                 |                |
|                                                                           | ICM       | 10 (43.5%)                 | 23 (23.5%)                 |                |
| <b>EF (%) (Mean (SD))</b>                                                 |           | 29.0 (10.5)                | 29.8 (13.0)                | 0.863          |
| <b>NYHA Class (%)</b>                                                     |           |                            |                            | 0.910          |
|                                                                           | I         | 2 (9.1%)                   | 11 (11.6%)                 |                |
|                                                                           | II        | 8 (36.4%)                  | 40 (42.1%)                 |                |
|                                                                           | III       | 10 (45.5%)                 | 37 (38.9%)                 |                |
|                                                                           | IV        | 2 (9.1%)                   | 7 (7.4%)                   |                |
| <b>VF as part of presentation</b>                                         |           | 8 (34.8%)                  | 39 (39.8%)                 | 0.837          |
| <b>Electrical Storm (%)</b>                                               |           | 16 (69.6%)                 | 75 (76.5%)                 | 0.669          |
| <b>Number of Shocks or sustained VT episodes in the year prior to CSD</b> |           |                            |                            | 0.321          |
|                                                                           | Mean (SD) | 16.8 (15.6)                | 17.9 (33.3)                |                |
|                                                                           | Median    |                            |                            |                |
|                                                                           | (Q1-Q3)   | 11.0 (7.0-22.0)            | 9.5 (4.0-17.0)             |                |
|                                                                           | Min-Max   | 1.0-60.0                   | 0.0-300.0                  |                |
| <b>VT morphology (&gt; 1 morphology)</b>                                  |           | 18 (78.3%)                 | 59 (60.2%)                 | 0.168          |
| <b>Presence of Polymorphic VT</b>                                         |           | 5 (25.0%)                  | 30 (41.7%)                 | 0.272          |
| <b>VT cycle length (ms)</b>                                               |           |                            |                            | 0.053          |
|                                                                           | Mean (SD) | 368.0 (84.4)               | 324.0 (78.6)               |                |
|                                                                           | Median    | 380.0 (307.5-              | 330.0 (268.0-              |                |
|                                                                           | (Q1-Q3)   | 399.7)                     | 377.8)                     |                |
|                                                                           | Min-Max   | 220.0-529.0                | 160.0-540.0                |                |
| <b>VT cycle length (ms)</b>                                               |           |                            |                            | <b>0.027</b>   |
|                                                                           | Mean (SD) | 411.7 (110.2)              | 348.5 (101.2)              |                |
|                                                                           | Median    | 420.0 (315.0-              | 333.0 (280.0-              |                |
|                                                                           | (Q1-Q3)   | 500.0)                     | 400.0)                     |                |
|                                                                           | Min-Max   | 220.0-580.0                | 160.0-600.0                |                |
| <b># VT ablations</b>                                                     |           |                            |                            | 0.526          |
|                                                                           | Mean (SD) | 1.5 (1.4)                  | 1.3 (1.4)                  |                |
|                                                                           | Median    |                            |                            |                |
|                                                                           | (Q1-Q3)   | 1.0 (0.5-2.0)              | 1.0 (0.0-2.0)              |                |
|                                                                           | Min-Max   | 0.0-6.0                    | 0.0-8.0                    |                |
| <b>Prior cardiac surgery</b>                                              |           | 11 (47.8%)                 | 20 (20.4%)                 | <b>0.014</b>   |
| <b>HTN</b>                                                                |           | 17 (73.9%)                 | 51 (52.0%)                 | 0.095          |
| <b>Hyperlipidemia</b>                                                     |           | 16 (69.6%)                 | 37 (37.8%)                 | <b>0.011</b>   |
| <b>AF</b>                                                                 |           | 7 (30.4%)                  | 23 (23.5%)                 | 0.669          |
| <b>DM</b>                                                                 |           | 9 (39.1%)                  | 14 (14.3%)                 | <b>0.015</b>   |
| <b>CKD</b>                                                                |           | 10 (52.6%)                 | 14 (20.0%)                 | <b>0.011</b>   |
| <b>&gt;1 AAD</b>                                                          |           | 15 (65.2%)                 | 45 (45.9%)                 | 0.151          |
| <b>Beta blocker therapy</b>                                               |           | 21 (91.3%)                 | 90 (91.8%)                 | 1              |

**Supplemental Figure 1. Freedom from sustained VT, ICD shock, and ATP**

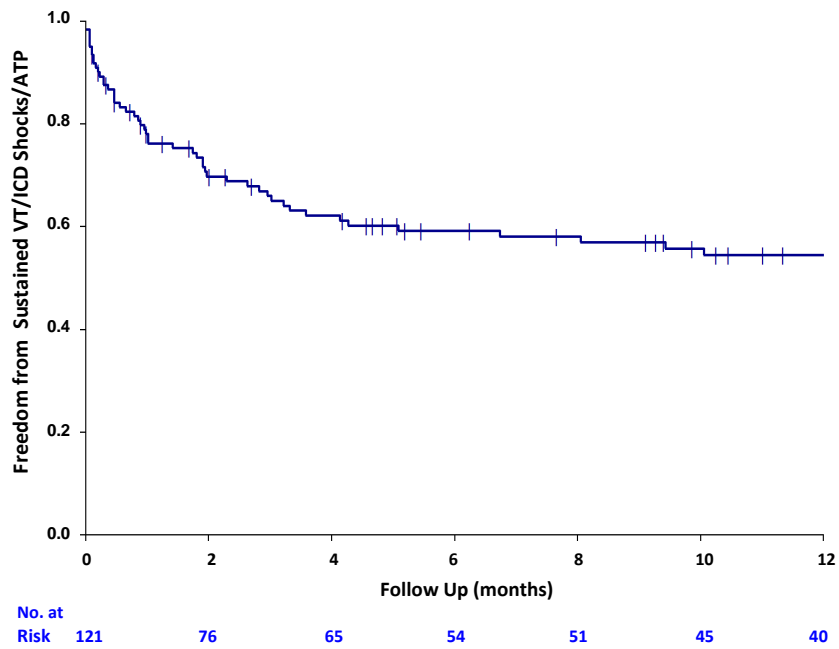

**Supplemental Figure 1. Freedom from sustained VT, ICD shock, and ATP.** Kaplan Meier estimate for freedom from sustained VT, ICD shock, and ATP in the overall cohort at one year of follow up is shown.

**Supplemental figure 2. Pre-procedural variables associated with VT-free transplant-free survival after CSD**

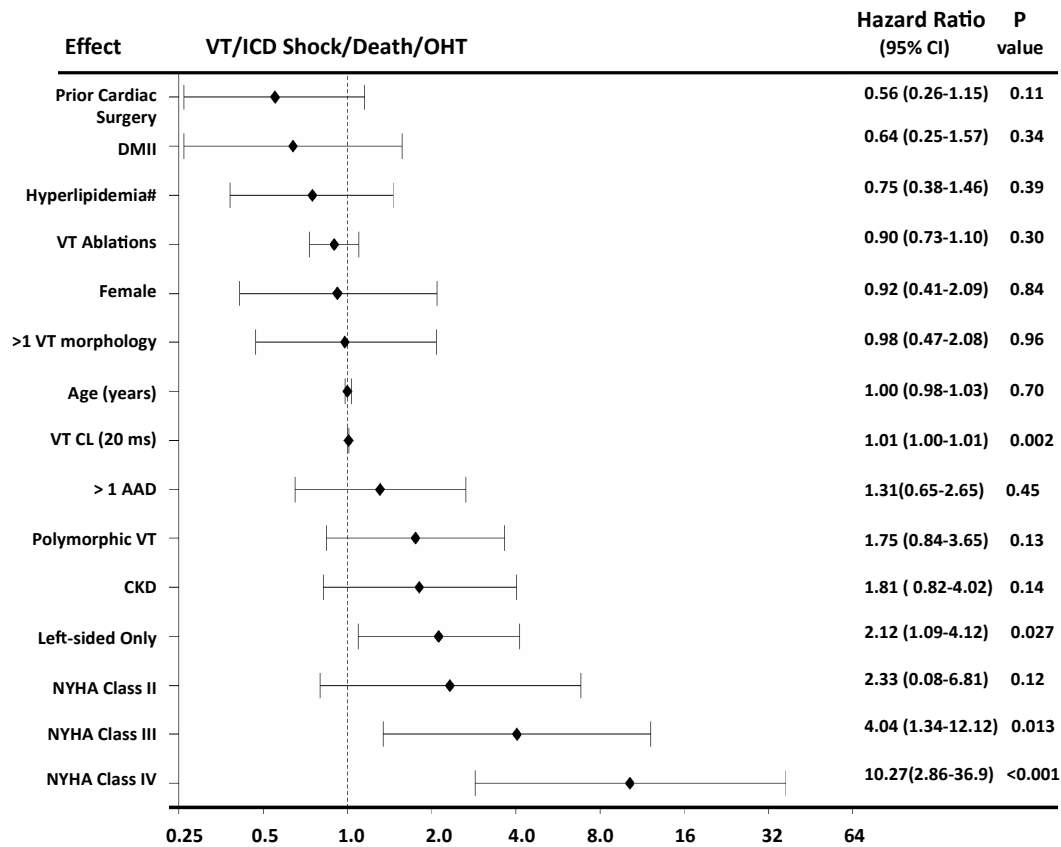

**Supplemental figure 2. Pre-procedural variables associated with VT-free**

**Transplant-free survival after CSD.** Hazard ratio plot of multivariable Cox proportional hazard regression for combined end-point of sustained VT/ICD shock, cardiac transplantation, and death after adjusting for variables that were different between bilateral vs. left only CSD patients. After adjustment for these variables, left-sided only procedure, NYHA Class, and longer VT cycle length continued to be independently associated with worse outcomes after CSD. AAD = anti-arrhythmic drug, CKD = chronic kidney disease, DM = diabetes mellitus, NYHA = New York Heart Association.
